# Supplementary material
Source: Royal Society of Chemistry journal article supplement (doi:10.1039/d6dt00207b)
Supplement: d6dt00207b1.pdf [file d6dt00207b1.pdf]

## Structural Design Principles for Hybrid Cadmium Thiocyanate-Halides Containing Bulky Organic Cations

Alexander Milder and Patrick M. Woodward

*Department of Chemistry and Biochemistry, The Ohio State University, Columbus, Ohio 43210,  
United States*

Corresponding Author: PMW: woodward.55@osu.edu

### Supplementary Information

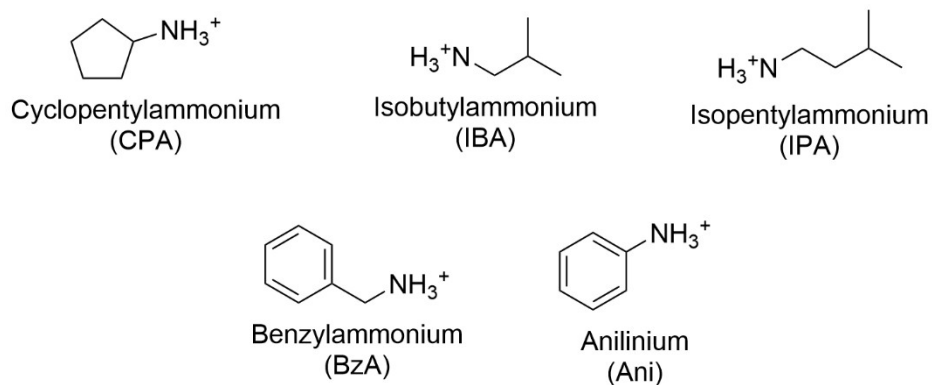

**Figure S1:** Structures and abbreviations used for the new compounds reported in this work

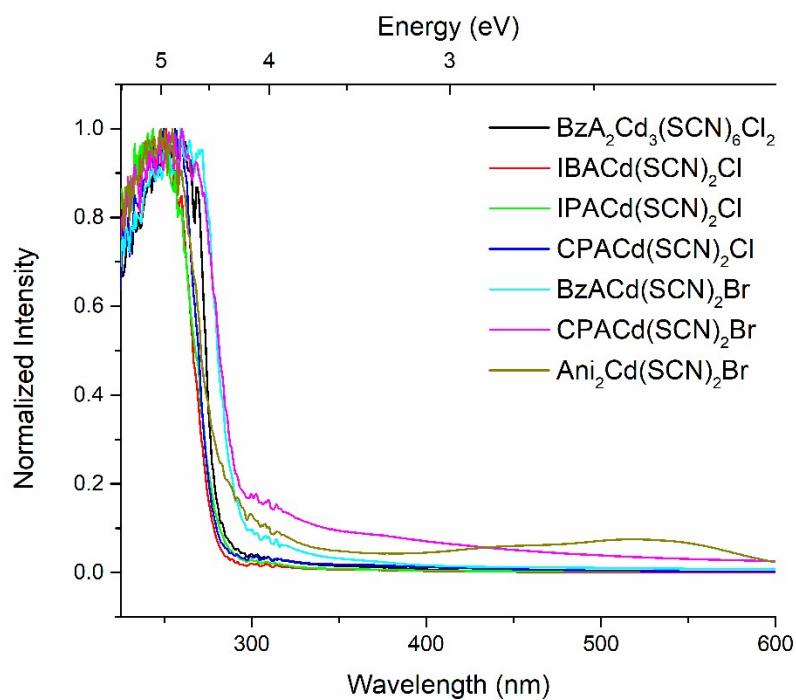

**Figure S2:** DRS data for all new compounds reported in this work. The vertical axis represents Kubelka-Munk transformed pseudo-absorbance, normalized by dividing by the maximum intensity of each trace.

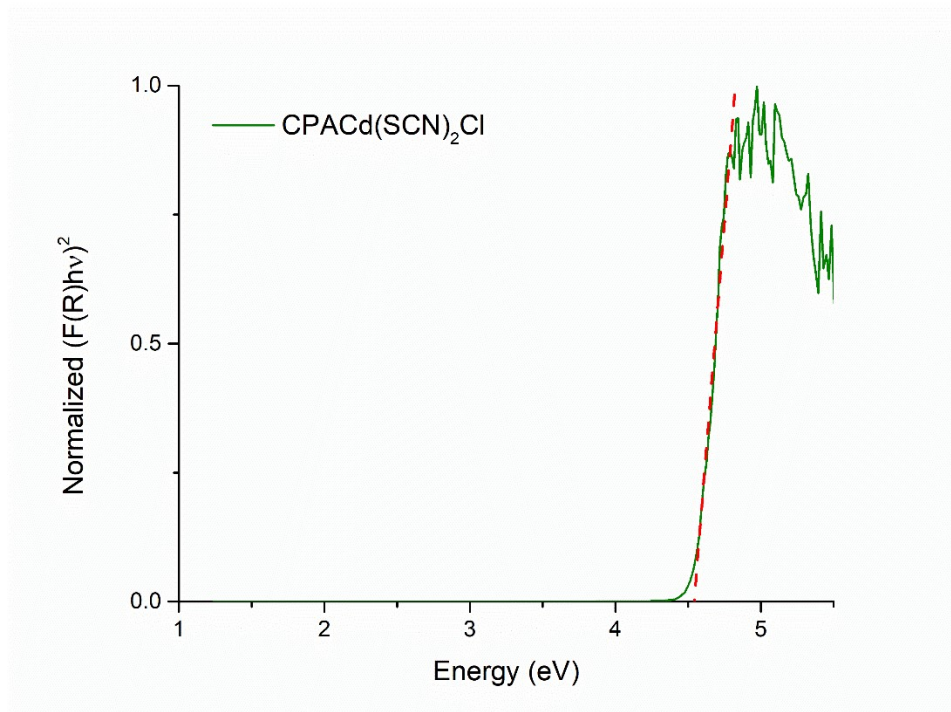

**Figure S3:** Tauc plot of compound **1** showing measured direct band gap of 4.54 eV. The green trace is the square of the Kubelka-Munk transformed pseudo absorbance,  $F(R)$ , multiplied by the photon energy,  $h\nu$ . We assume a direct band gap so this quantity is squared to complete the Tauc plot. The red dashed lines show the extrapolated fit to the linear portion of this plot, which is used to determine the band gap.

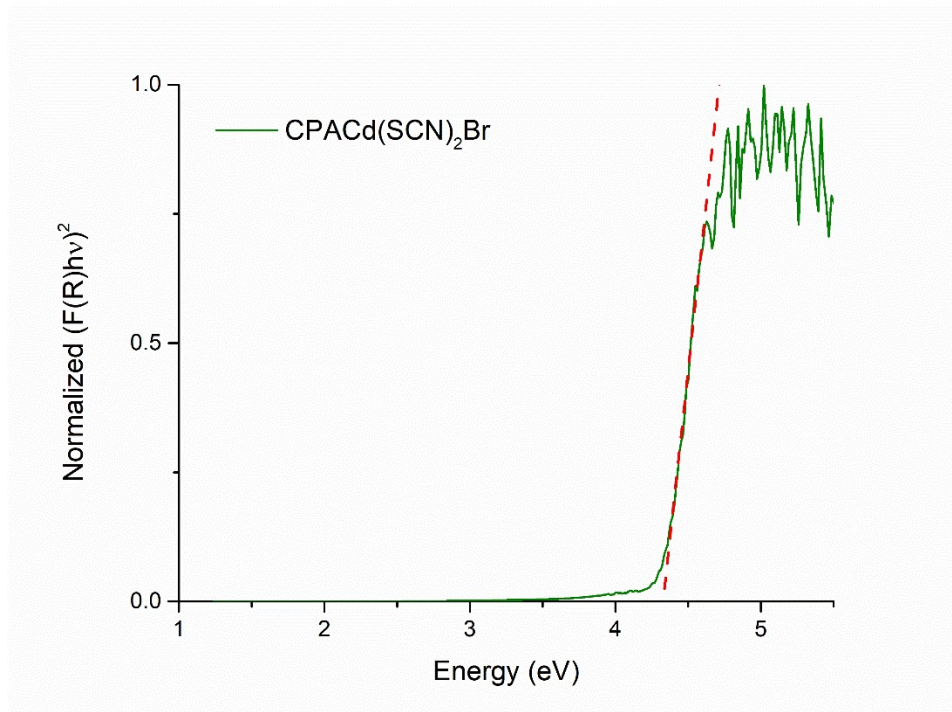

**Figure S4:** Tauc plot of compound **2** showing measured direct band gap of 4.33 eV. The green trace is the square of the Kubelka-Munk transformed pseudo absorbance,  $F(R)$ , multiplied by the photon energy,  $h\nu$ . We assume a direct band gap so this quantity is squared to complete the Tauc plot. The red dashed lines show the extrapolated fit to the linear portion of this plot, which is used to determine the band gap.

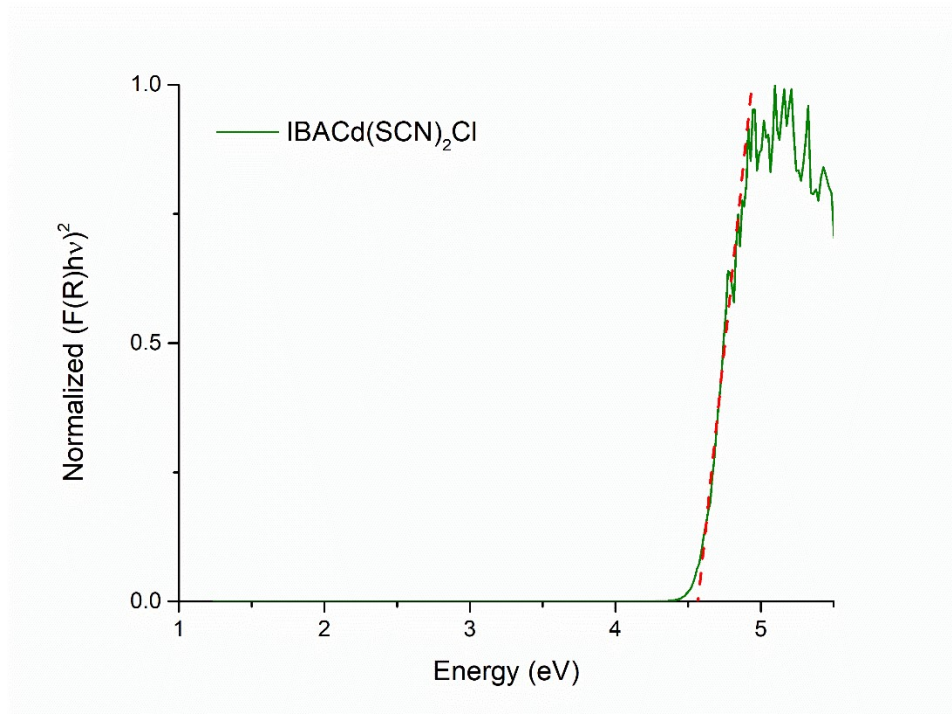

**Figure S5:** Tauc plot of compound **3** showing measured direct band gap of 4.57 eV. The green trace is the square of the Kubelka-Munk transformed pseudo absorbance,  $F(R)$ , multiplied by the photon energy,  $h\nu$ . We assume a direct band gap so this quantity is squared to complete the Tauc plot. The red dashed lines show the extrapolated fit to the linear portion of this plot, which is used to determine the band gap.

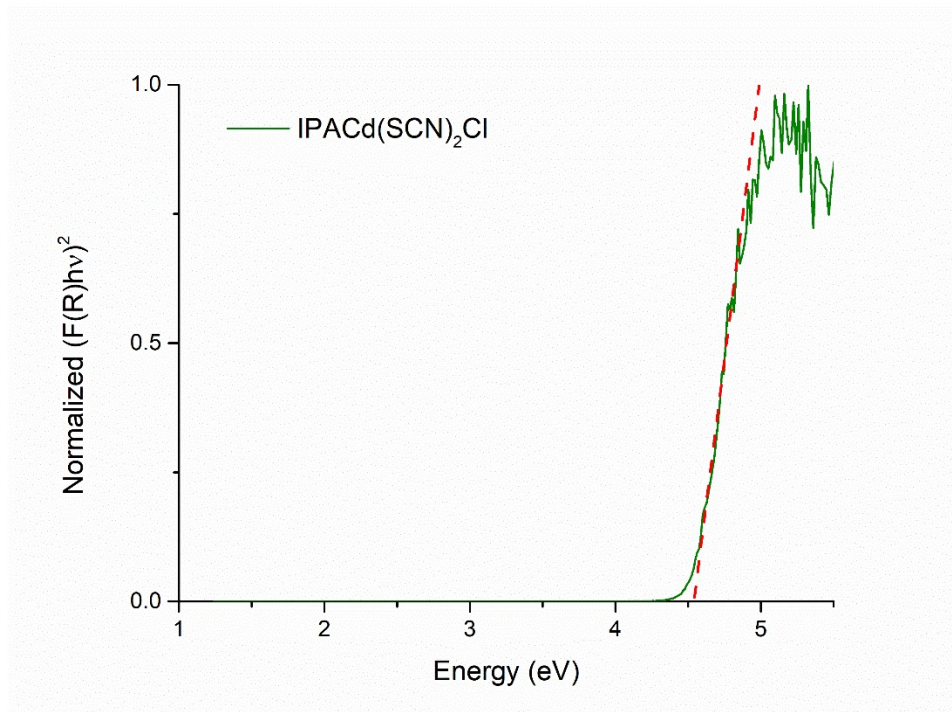

**Figure S6:** Tauc plot of compound **4** showing measured direct band gap of 4.54 eV. The green trace is the square of the Kubelka-Munk transformed pseudo absorbance,  $F(R)$ , multiplied by the photon energy,  $h\nu$ . We assume a direct band gap so this quantity is squared to complete the Tauc plot. The red dashed lines show the extrapolated fit to the linear portion of this plot, which is used to determine the band gap.

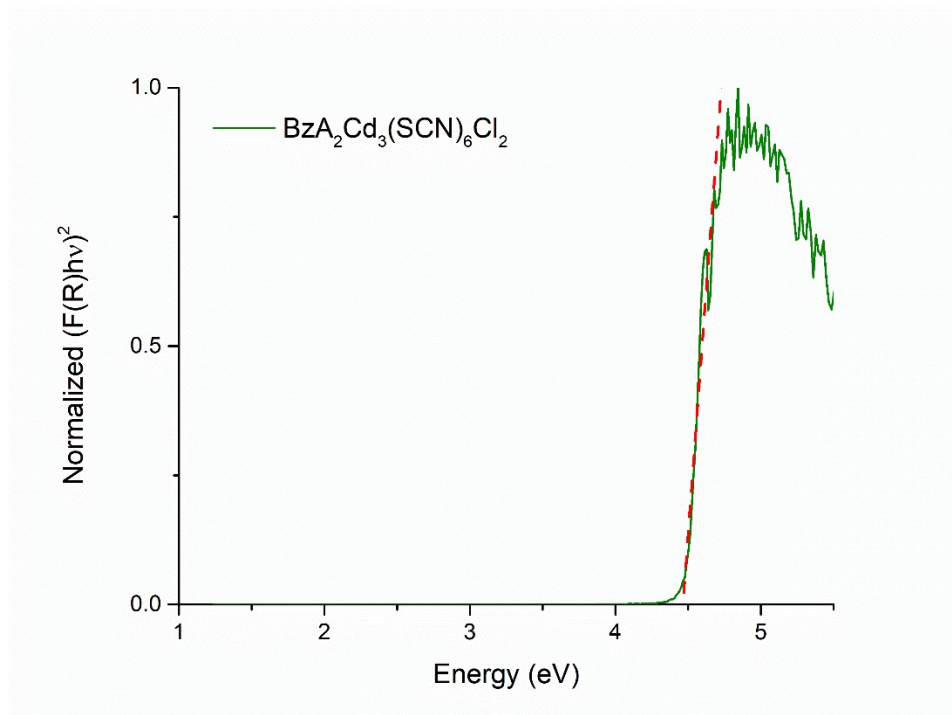

**Figure S7:** Tauc plot of compound **5** showing measured direct band gap of 4.46 eV. The green trace is the square of the Kubelka-Munk transformed pseudo absorbance,  $F(R)$ , multiplied by the photon energy,  $h\nu$ . We assume a direct band gap so this quantity is squared to complete the Tauc plot. The red dashed lines show the extrapolated fit to the linear portion of this plot, which is used to determine the band gap.

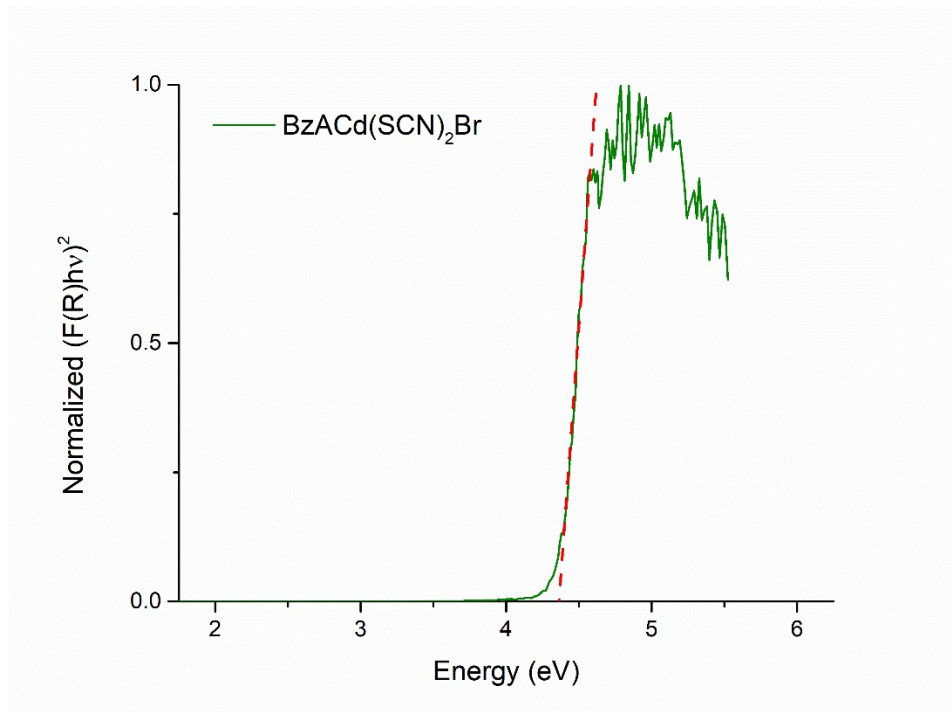

**Figure S8:** Tauc plot of compound **6** showing measured direct band gap of 4.36 eV. The green trace is the square of the Kubelka-Munk transformed pseudo absorbance,  $F(R)$ , multiplied by the photon energy,  $h\nu$ . We assume a direct band gap so this quantity is squared to complete the Tauc plot. The red dashed lines show the extrapolated fit to the linear portion of this plot, which is used to determine the band gap.

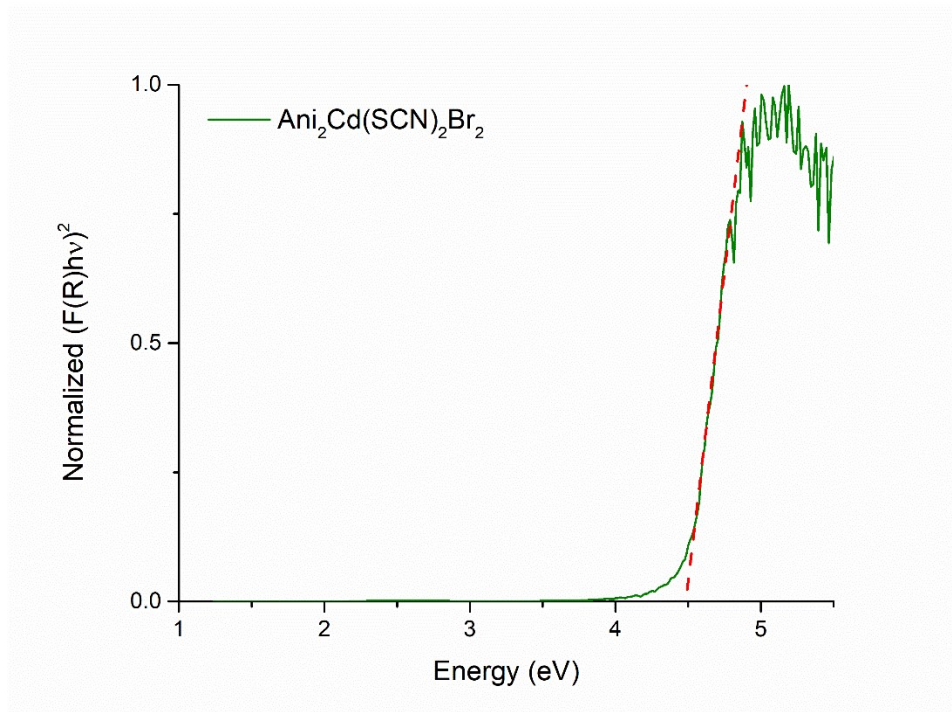

**Figure S9:** Tauc plot of compound **7** showing measured direct band gap of 4.48 eV. The green trace is the square of the Kubelka-Munk transformed pseudo absorbance,  $F(R)$ , multiplied by the photon energy,  $h\nu$ . We assume a direct band gap so this quantity is squared to complete the Tauc plot. The red dashed lines show the extrapolated fit to the linear portion of this plot, which is used to determine the band gap.

**Figures S10-S16:** Representative powder X-ray diffraction data and Pawley refinements for ground crystals of compounds **1-7**. Data was collected on either a Bruker D8 Advance powder diffractometer equipped with a monochromated Cu sealed tube source or a Rigaku Miniflex I powder diffractometer with a non-monochromated Cu source as noted.

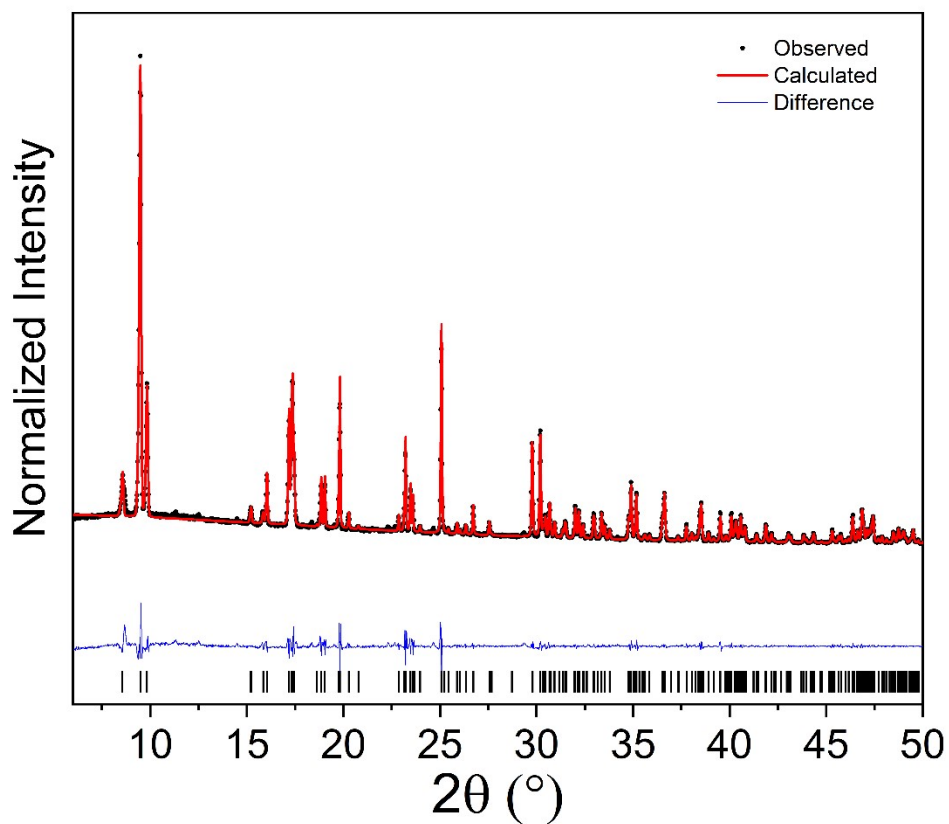

**Figure S10:** PXRD and Pawley refinement of compound **1** from data collected on the Bruker D8 instrument.

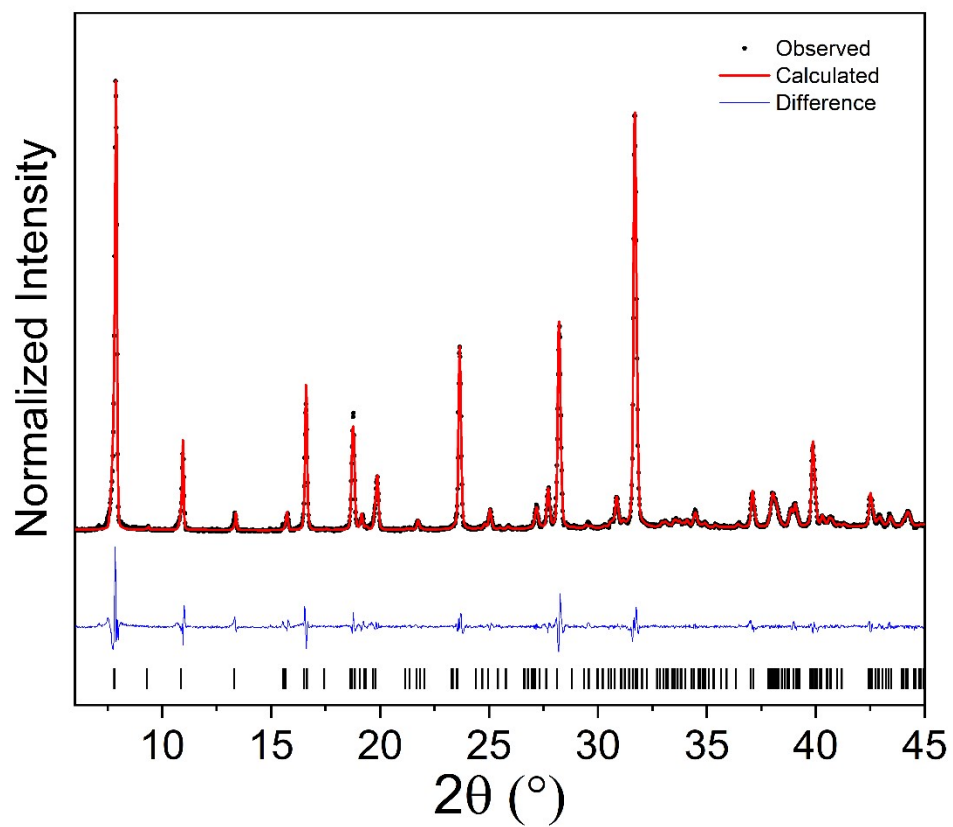

**Figure S11:** PXRD and Pawley refinement of compound **2** from data collected on the Rigaku Miniflex I instrument.

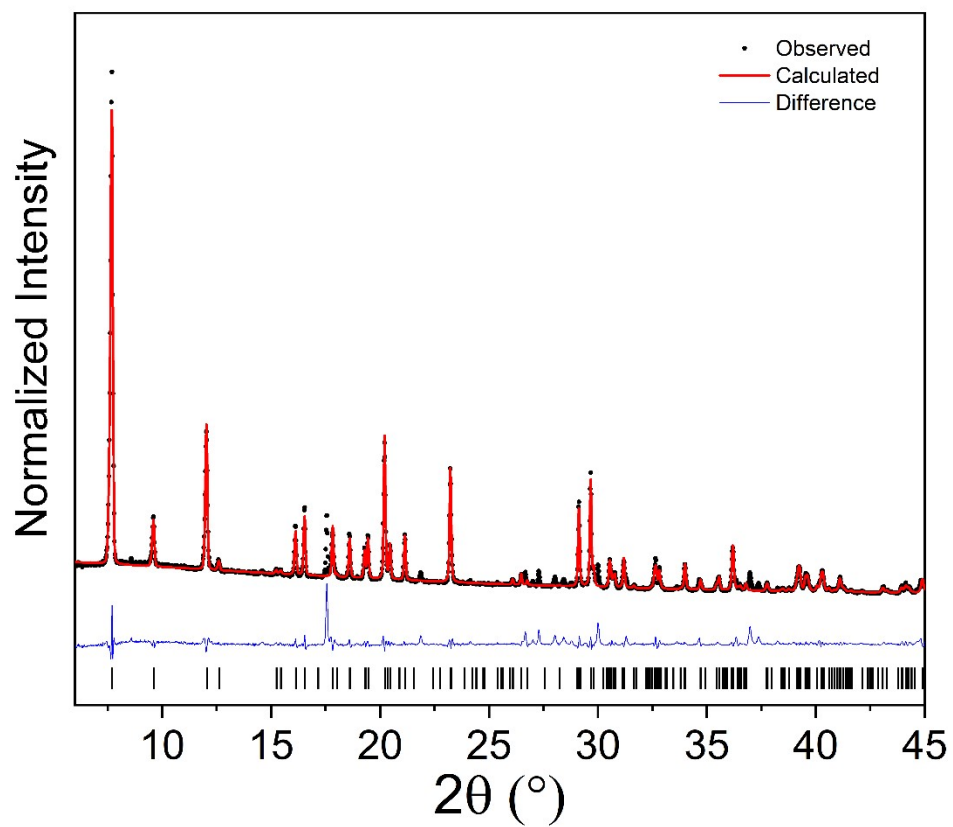

**Figure S12:** PXRD and Pawley refinement of compound **3** from data collected on the Bruker D8 instrument.

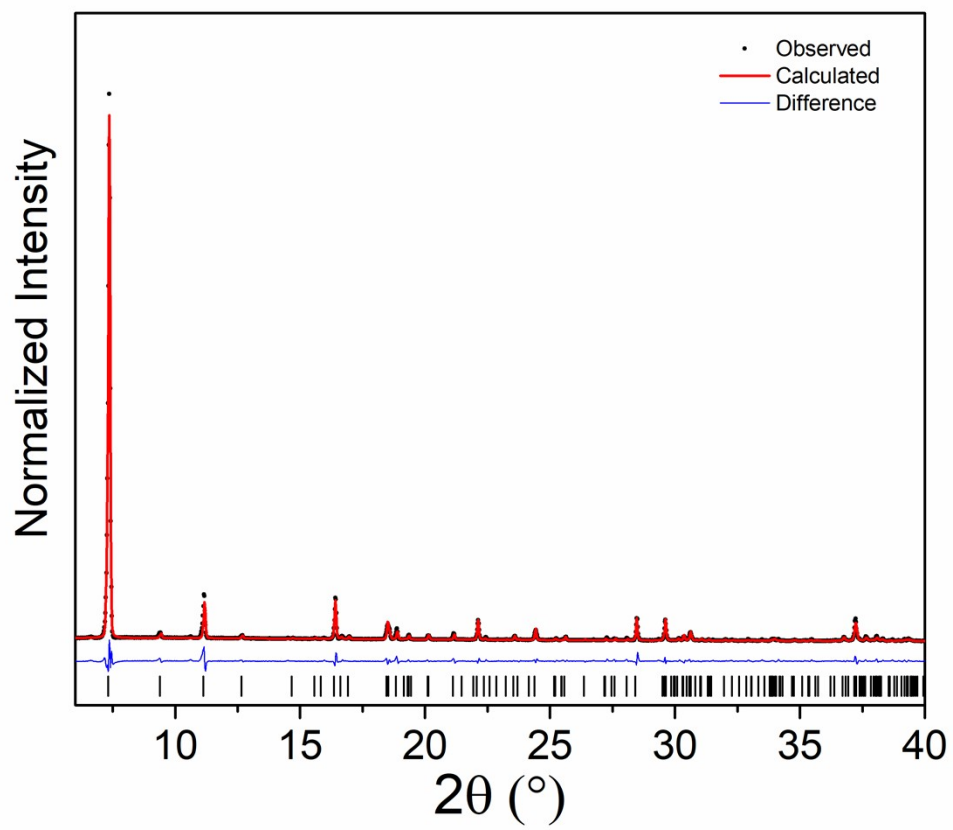

**Figure S13:** PXRD and Pawley refinement of compound **4** from data collected on the Bruker D8 instrument.

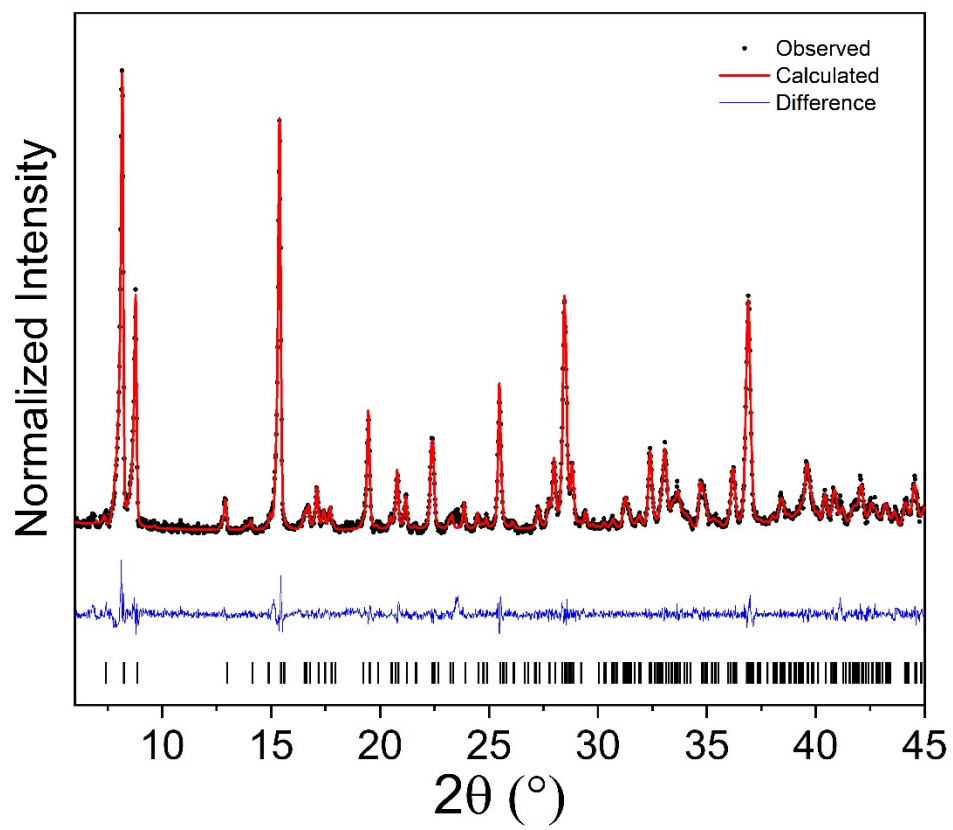

**Figure S14:** PXRD and Pawley refinement of compound **5** from data collected on the Bruker D8 instrument.

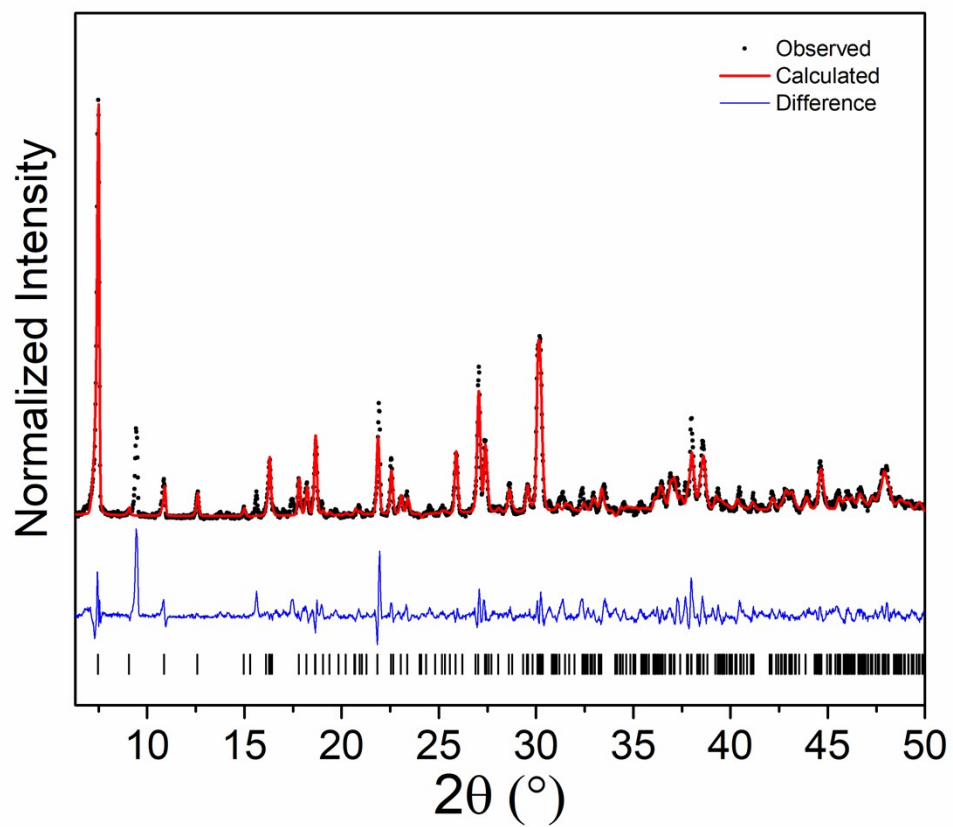

**Figure S15:** PXRd and Pawley refinement of compound **6** from data collected on the Rigaku Miniflex I instrument.

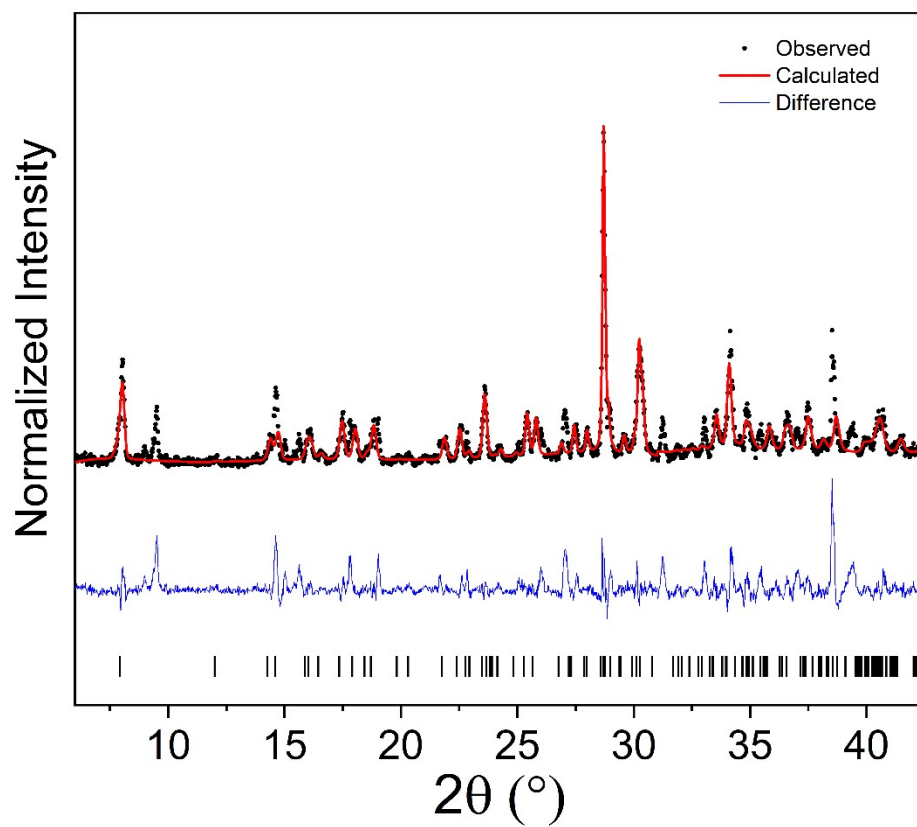

**Figure S16:** PXRd and Pawley refinement of compound 7 from data collected on the Rigaku Miniflex I instrument.

**Table S1:** Lattice parameters and refinement indicators for compounds 1–4

| Composition                                        | CPACd(SCN) <sub>2</sub> Cl                                         | CPACd(SCN) <sub>2</sub> Br                                         | IBACd(SCN) <sub>2</sub> Cl                                         | IPACd(SCN) <sub>2</sub> Cl                                         |
|----------------------------------------------------|--------------------------------------------------------------------|--------------------------------------------------------------------|--------------------------------------------------------------------|--------------------------------------------------------------------|
| <i>T</i> (K)                                       | 298                                                                | 298                                                                | 100                                                                | 100                                                                |
| Space Group                                        | <i>P</i> $\bar{1}$                                                 | <i>P</i> $\bar{1}$                                                 | <i>P</i> $\bar{1}$                                                 | <i>P</i> $\bar{1}$                                                 |
| <i>a</i> (Å)                                       | 5.9082(4)                                                          | 5.9164(6)                                                          | 5.9664(3)                                                          | 5.8644(2)                                                          |
| <i>b</i> (Å)                                       | 10.2084(8)                                                         | 9.8218(12)                                                         | 9.2609(4)                                                          | 9.7409(4)                                                          |
| <i>c</i> (Å)                                       | 11.4671(8)                                                         | 11.8747(15)                                                        | 11.1509(5)                                                         | 12.1164(5)                                                         |
| $\alpha$ (°)                                       | 113.822(2)                                                         | 99.211(4)                                                          | 87.173(2)                                                          | 79.4470(10)                                                        |
| $\beta$ (°)                                        | 99.670(2)                                                          | 103.298(4)                                                         | 83.075(2)                                                          | 78.1680(10)                                                        |
| $\gamma$ (°)                                       | 90.293(2)                                                          | 98.195(4)                                                          | 79.6580(10)                                                        | 79.1370(10)                                                        |
| <i>V</i> (Å <sup>3</sup> )                         | 621.66(8)                                                          | 651.22(13)                                                         | 601.46(5)                                                          | 657.74(4)                                                          |
| <i>Z</i>                                           | 2                                                                  | 2                                                                  | 2                                                                  | 2                                                                  |
| <i>R</i> <sub>1</sub> / <i>wR</i> <sub>2</sub> (%) | 3.77/7.43                                                          | 4.59/8.56                                                          | 2.32/4.75                                                          | 1.75/4.36                                                          |
| Density (g/cm <sup>3</sup> )                       | 1.871                                                              | 2.013                                                              | 1.867                                                              | 1.778                                                              |
| Absorption Coefficient (mm <sup>-1</sup> )         | 2.274                                                              | 5.034                                                              | 2.347                                                              | 2.150                                                              |
| F(000)                                             | 344                                                                | 380                                                                | 332                                                                | 348                                                                |
| $\theta$ Range for Data Collection (°)             | 3.500–28.385                                                       | 3.058–28.375                                                       | 3.494–28.356                                                       | 3.595–28.350                                                       |
| Index Ranges                                       | $-7 \leq h \leq 7$<br>$-13 \leq k \leq 13$<br>$-15 \leq l \leq 15$ | $-7 \leq h \leq 7$<br>$-13 \leq k \leq 13$<br>$-15 \leq l \leq 15$ | $-7 \leq h \leq 7$<br>$-12 \leq k \leq 12$<br>$-14 \leq l \leq 14$ | $-7 \leq h \leq 7$<br>$-12 \leq k \leq 12$<br>$-16 \leq l \leq 16$ |
| Reflections collected                              | 35761                                                              | 39452                                                              | 32292                                                              | 31508                                                              |
| Independent Reflections                            | 3107                                                               | 3249                                                               | 2989                                                               | 3219                                                               |
| Parameters Refined                                 | 128                                                                | 128                                                                | 121                                                                | 172                                                                |
| Completeness to 50.5° (%)                          | 99.9                                                               | 99.9                                                               | 99.8                                                               | 97.5                                                               |
| Goodness of fit                                    | 1.025                                                              | 1.005                                                              | 1.137                                                              | 1.105                                                              |
| Largest Difference Peak and Hole                   | 0.5/–0.4                                                           | 0.5/–0.6                                                           | 0.4/–0.4                                                           | 0.6/–0.5                                                           |

**Table S2:** Lattice parameters and refinement indicators for compounds 4-6

| Composition                                        | BzA <sub>2</sub> Cd <sub>3</sub> (SCN) <sub>6</sub> Cl <sub>2</sub> | BzACd(SCN) <sub>2</sub> Br                                      | Ani <sub>2</sub> Cd(SCN) <sub>2</sub> Br <sub>2</sub>           |
|----------------------------------------------------|---------------------------------------------------------------------|-----------------------------------------------------------------|-----------------------------------------------------------------|
| <i>T</i> (K)                                       | 298                                                                 | 298                                                             | 298                                                             |
| Space Group                                        | <i>P</i> 2 <sub>1</sub> / <i>n</i>                                  | <i>P</i> $\bar{1}$                                              | <i>C</i> 2/ <i>c</i>                                            |
| <i>a</i> (Å)                                       | 12.7917(17)                                                         | 5.8458(3)                                                       | 22.100(2)                                                       |
| <i>b</i> (Å)                                       | 5.8894(7)                                                           | 10.1305(6)                                                      | 7.8037(7)                                                       |
| <i>c</i> (Å)                                       | 21.896(3)                                                           | 12.1382(6)                                                      | 11.0731(8)                                                      |
| $\alpha$ (°)                                       | 90                                                                  | 79.520(2)                                                       | 90                                                              |
| $\beta$ (°)                                        | 101.592(4)                                                          | 80.742(2)                                                       | 94.037(5)                                                       |
| $\gamma$ (°)                                       | 90                                                                  | 76.902(2)                                                       | 90                                                              |
| <i>V</i> (Å <sup>3</sup> )                         | 1615.9(4)                                                           | 683.06(6)                                                       | 1905.0(3)                                                       |
| <i>Z</i>                                           | 2                                                                   | 2                                                               | 4                                                               |
| <i>R</i> <sub>1</sub> / <i>wR</i> <sub>2</sub> (%) | 2.96/7.72                                                           | 3.30/6.65                                                       | 1.92/4.82                                                       |
| Density (g/cm <sup>3</sup> )                       | 2.000                                                               | 2.026                                                           | 2.011                                                           |
| Absorption Coefficient (mm <sup>-1</sup> )         | 2.536                                                               | 4.806                                                           | 5.563                                                           |
| F(000)                                             | 940                                                                 | 400                                                             | 1112                                                            |
| $\theta$ Range for Data Collection (°)             | 2.983-26.594                                                        | 2.900-28.401                                                    | 3.689-28.411                                                    |
| Index Ranges                                       | -16 ≤ <i>h</i> ≤ 16<br>-7 ≤ <i>k</i> ≤ 7<br>-27 ≤ <i>l</i> ≤ 27     | -7 ≤ <i>h</i> ≤ 7<br>-13 ≤ <i>k</i> ≤ 13<br>-16 ≤ <i>l</i> ≤ 16 | -7 ≤ <i>h</i> ≤ 7<br>-13 ≤ <i>k</i> ≤ 13<br>-15 ≤ <i>l</i> ≤ 15 |
| Reflections collected                              | 56748                                                               | 23247                                                           | 53331                                                           |
| Independent Reflections                            | 3379                                                                | 3411                                                            | 2386                                                            |
| Parameters Refined                                 | 179                                                                 | 146                                                             | 106                                                             |
| Completeness to 50.5° (%)                          | 99.7                                                                | 99.9                                                            | 99.8                                                            |
| Goodness of fit                                    | 1.067                                                               | 1.002                                                           | 1.047                                                           |
| Largest Difference Peak and Hole                   | 0.5/-0.5                                                            | 0.4/-0.5                                                        | 0.6/-1.0                                                        |

**Table S3:** Band gaps determined from DRS using the Tauc method and the DFT calculated band structures

|                                                                     | Direct $E_g$ from DRS (eV) | Direct $E_g$ from DFT (eV) | Indirect $E_g$ from DFT (eV) |
|---------------------------------------------------------------------|----------------------------|----------------------------|------------------------------|
| CPACd(SCN) <sub>2</sub> Cl                                          | 4.54                       | 3.79                       | 3.74                         |
| CPACd(SCN) <sub>2</sub> Br                                          | 4.33                       | 3.63                       | 3.53                         |
| IBACd(SCN) <sub>2</sub> Cl                                          | 4.57                       | ---                        | ---                          |
| IPACd(SCN) <sub>2</sub> Cl                                          | 4.54                       | ---                        | ---                          |
| BzA <sub>2</sub> Cd <sub>3</sub> (SCN) <sub>6</sub> Cl <sub>2</sub> | 4.46                       | ---                        | ---                          |
| BzACd(SCN) <sub>2</sub> Br                                          | 4.36                       | ---                        | ---                          |
| Ani <sub>2</sub> Cd(SCN) <sub>2</sub> Br <sub>2</sub>               | 4.48                       | ---                        | ---                          |
